# Supplementary material
Source: HighWire-hosted journal article supplement (http://www.cmaj.ca/highwire/filestream/78341/field_highwire_adjunct_files/0/201607-five-1-at.pdf)
Supplement: 201607-five-1-at.pdf [file 201607-five-1-at.pdf]

## Appendix 1

| Comparison of clinical presentation of adenomyosis with other gynecological conditions |                                                                                                                                                     |                                                                                                             |
|----------------------------------------------------------------------------------------|-----------------------------------------------------------------------------------------------------------------------------------------------------|-------------------------------------------------------------------------------------------------------------|
| Gynecological condition                                                                | Symptom                                                                                                                                             | Sign                                                                                                        |
| Endometrial polyp                                                                      | Intermenstrual spotting, HMB, postmenopausal bleeding                                                                                               | Normal bimanual examination; possible protrusion of polyp through cervix visualized by speculum examination |
| Fibroid                                                                                | HMB, bulk symptoms (pelvic pressure, urinary retention, urinary frequency, constipation), acute pain related to degeneration (breakdown of fibroid) | Large, irregular, firm uterus on bimanual or abdominal examination                                          |
| Endometriosis                                                                          | Dysmenorrhea, dyspareunia, dysuria, dyschezia and chronic pelvic pain                                                                               | Retroverted uterus, uterosacral nodularity and tenderness on bimanual examination                           |
| Adenomyosis                                                                            | Dysmenorrhea, dyspareunia, HMB                                                                                                                      | Globular, enlarged or boggy uterus, sometimes tender on bimanual or abdominal examination                   |
| Note: HMB = heavy menstrual bleeding.                                                  |                                                                                                                                                     |                                                                                                             |
